# Supplementary material for: Mentalization Impairment Is Associated with Problematic Alcohol Use in a Sample of Young Adults: A Cross-Sectional Study
Source: MDPI journal article supplement (doi:10.3390/ijerph17228664), 2020-11-22
Supplement: s1 [file s1]

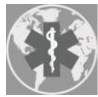

# Supplementary Materials: Mentalization Impairment Is Associated with Problematic Alcohol Use in a Sample of Young Adults: A Cross-Sectional Study

**Table S1.** Differences between younger (18–24) and older (25–34) young adults.

| Variables                                | Younger<br>N = 187 | Older<br>N = 84 | Test                  | p=             | Effect Size     | r=           |
|------------------------------------------|--------------------|-----------------|-----------------------|----------------|-----------------|--------------|
| Age—M ± SD                               | 21.33 ± 2.04       | 27.37 ± 2.48    | U= 0.000              | < <b>0.001</b> | d= 2.663        | 0.800        |
| Females—N (%)                            | 121 (64.7%)        | 62 (73.8%)      | χ <sup>2</sup> = 2.19 | 0.139          | V= 0.090        | 0.090        |
| Tobacco use (last 12 months)—N (%)       | 91 (48.7%)         | 39 (46.4%)      | χ <sup>2</sup> = 0.12 | 0.733          | V= 0.021        | 0.021        |
| Illegal drugs use (last 12 months)—N (%) | 81 (43.3%)         | 25 (29.8%)      | χ <sup>2</sup> = 4.47 | <b>0.034</b>   | V= <b>0.128</b> | <b>0.128</b> |
| CAGE ≥ 1—N (%)                           | 55 (29.4%)         | 17 (20.2%)      | χ <sup>2</sup> = 2.50 | 0.114          | V= 0.096        | 0.096        |
| CAGE ≥ 2—N (%)                           | 30 (16.0%)         | 7 (8.3%)        | χ <sup>2</sup> = 2.92 | 0.087          | V= 0.104        | 0.104        |
| CAGE Total score—M ± SD                  | 0.50 ± 0.88        | 0.32 ± 0.73     | U= 7084.5             | 0.096          | d= 0.157        | 0.078        |
| MZQ Total score—M ± SD                   | 3.33 ± 0.77        | 3.58 ± 0.75     | U= 6288.0             | <b>0.009</b>   | d= <b>0.323</b> | <b>0.159</b> |
| Self-reflection—M ± SD                   | 3.48 ± 0.90        | 3.71 ± 0.89     | U= 6746.5             | 0.063          | d= 0.227        | 0.113        |
| Emotional awareness—M ± SD               | 3.34 ± 0.98        | 3.61 ± 1.06     | U= 6557.0             | <b>0.029</b>   | d= <b>0.266</b> | <b>0.132</b> |
| Psychic equivalence—M ± SD               | 3.24 ± 0.94        | 3.34 ± 0.93     | U= 7367.0             | 0.413          | d= 0.099        | 0.049        |
| Affect Regulation—M ± SD                 | 3.23 ± 1.07        | 3.71 ± 0.99     | U= 5792.5             | < <b>0.001</b> | d= 0.429        | <b>0.210</b> |

Abbreviations: CAGE= Cut-Annoyed-Guilty-Eye questionnaire; MZQ= Mentalization Questionnaire.
